# Supplementary material for: Requirements for RNA polymerase II preinitiation complex formation in vivo
Source: PubMed Central journal article supplement (PMC6366898; doi:10.7554/elife.43654), 2019-01-25
Supplement: elife-43654-supp1.pdf [file elife-43654-supp1.pdf]

## Table S1. Yeast Strains

### Strains used

| <b>Strain name</b> | <b>Genotype</b>                    | <b>Comment</b>                               |
|--------------------|------------------------------------|----------------------------------------------|
| HHY168             | MATalpha, tor1-1, fpr1::NAT, RPL1: | Wildtype control strain; Haruki et al., 2008 |
| KHW75              | MATalpha, tor1-1, fpr1::NAT, RPL1: | Pol II (Rpb1) anchor-away strain             |
| KHW76              | MATalpha, tor1-1, fpr1::NAT, RPL1: | TBP (Spt15) anchor-away strain               |
| KHW125             | MATalpha, tor1-1, fpr1::NAT, RPL1: | TFIIE (Tfa1) anchor-away strain              |
| KHW124             | MATalpha, tor1-1, fpr1::NAT, RPL1: | TFIIE (Tfa2) anchor-away strain              |
| KHW127             | MATalpha, tor1-1, fpr1::NAT, RPL1: | Kin28 anchor-away strain                     |
| YJ90               | MATalpha, tor1-1, fpr1::NAT, RPL1: | TFIIH (Ssl1) anchor-away strain              |
| NP137              | MATalpha, tor1-1, fpr1::NAT, RPL1: | TFIIH (Ssl2) anchor-away strain              |
| KHW129             | MATalpha, tor1-1, fpr1::NAT, RPL1: | TFIIB (Sua7) anchor-away strain              |
| KHW130             | MATalpha, tor1-1, fpr1::NAT, RPL1: | TFIIA (Toa1) anchor-away strain              |
| KHW131             | MATalpha, tor1-1, fpr1::NAT, RPL1: | TFIIA (Toa2) anchor-away strain              |
| KHW132             | MATalpha, tor1-1, fpr1::NAT, RPL1: | TFIID (Taf1) anchor-away strain              |
| KHW134             | MATalpha, tor1-1, fpr1::NAT, RPL1: | TFIIF (Tfg1) anchor-away strain              |
| YJ127              | MATalpha, tor1-1, fpr1::NAT, RPL1: | Spt16 anchor-away strain                     |
| KHW258             | MATalpha, tor1-1, fpr1::NAT, RPL1: | Rgr1 anchor-away strain                      |
